# Supplementary material for: A Mixed Complementarity-Based Equilibrium Model of Natural Gas Markets
Source: Atypon-hosted journal article supplement (doi:10.1287/opre.1040.0199), 2005-10-01
Supplement: opre.53.5.799-sm.pdf [file opre.53.5.799-sm.pdf]

Online Companion for  
“A Mixed Complementarity-Based Equilibrium  
Model of Natural Gas Markets”

Operations Research  
Volume 53, Number 5  
September-October 2005

Steven A. Gabriel  
University of Maryland

Supat Kiet  
University of Maryland

and

Jifang Zhuang  
University of Maryland

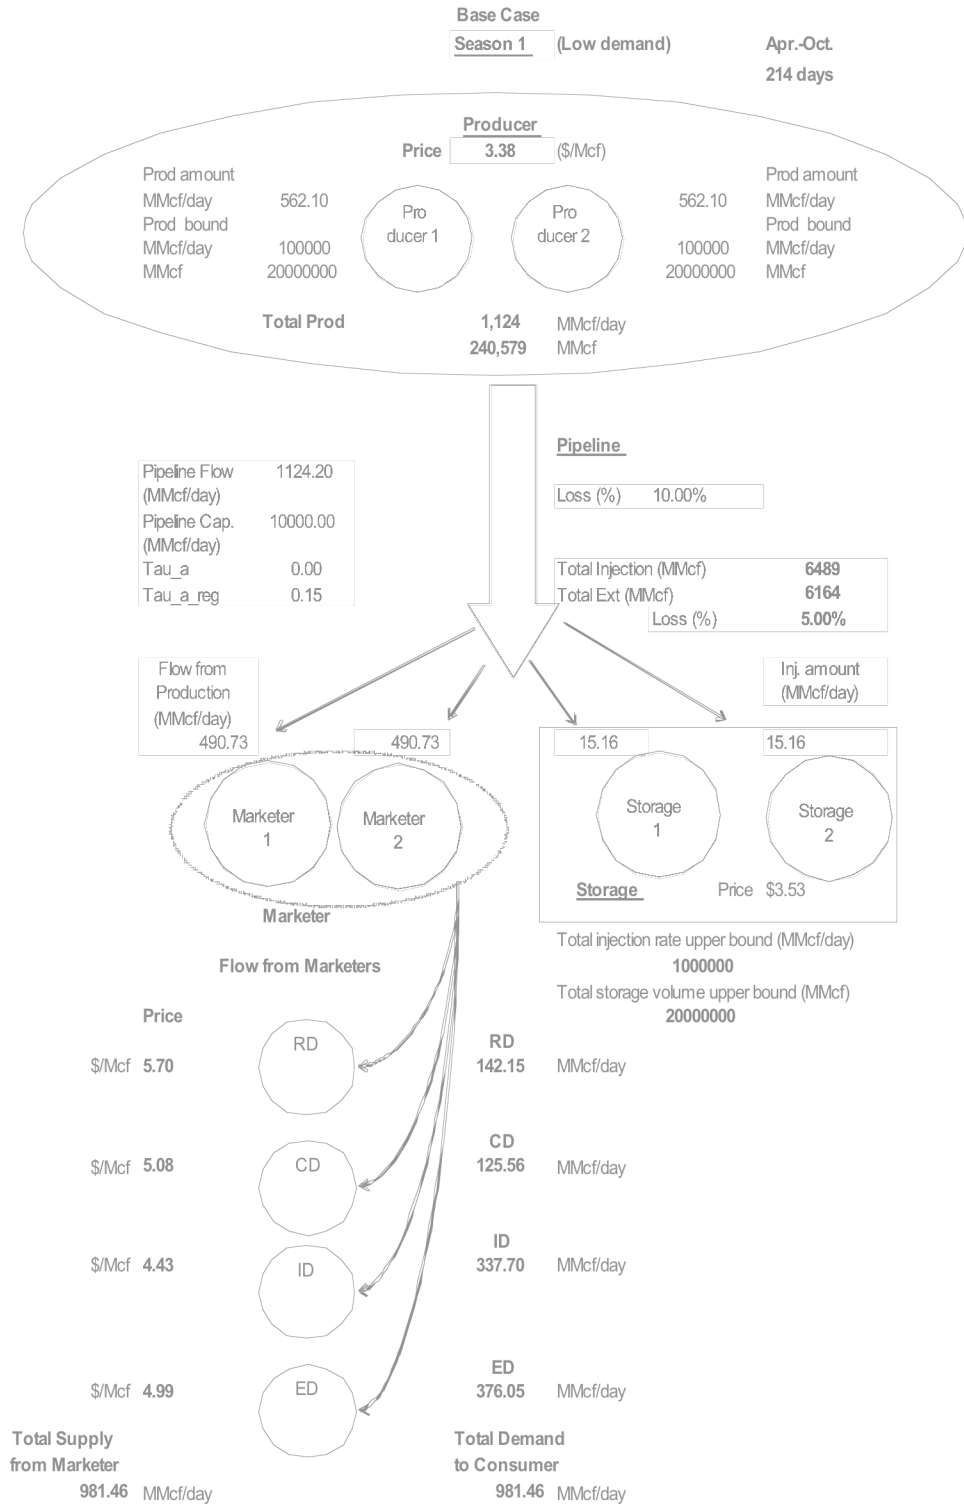

**Figure 1: Base Case Results Season 1.**

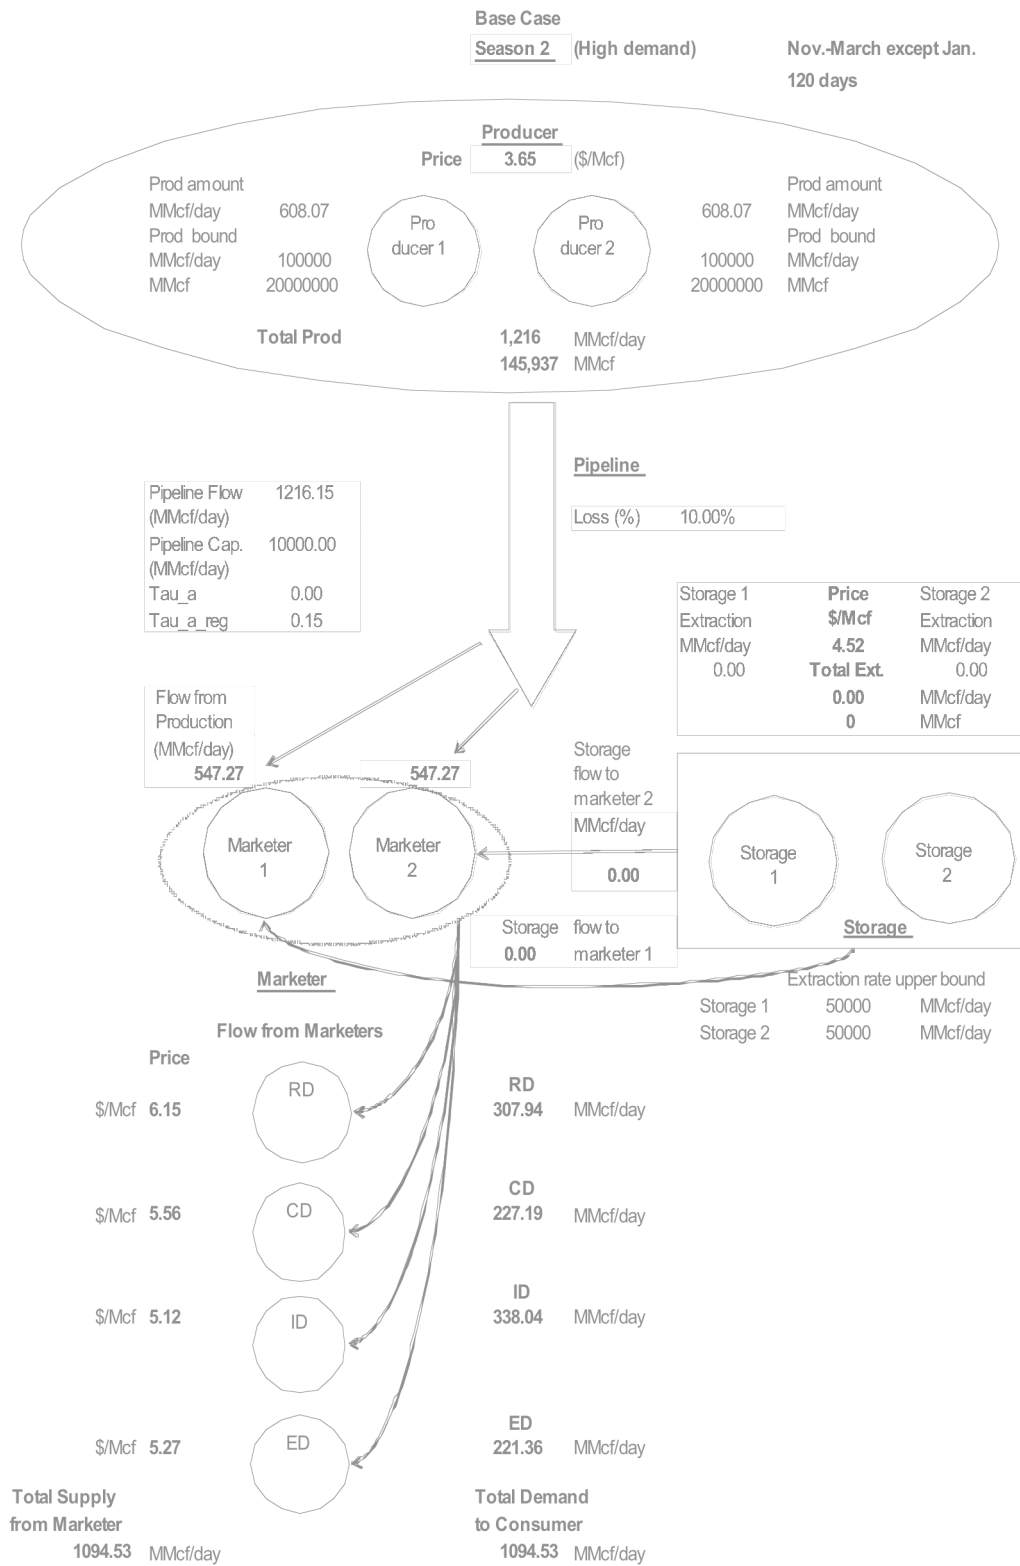

**Figure 2: Base Case Results Season 2.**

**Base Case**  
**Season 3 (Very high demand)** January  
 31 days

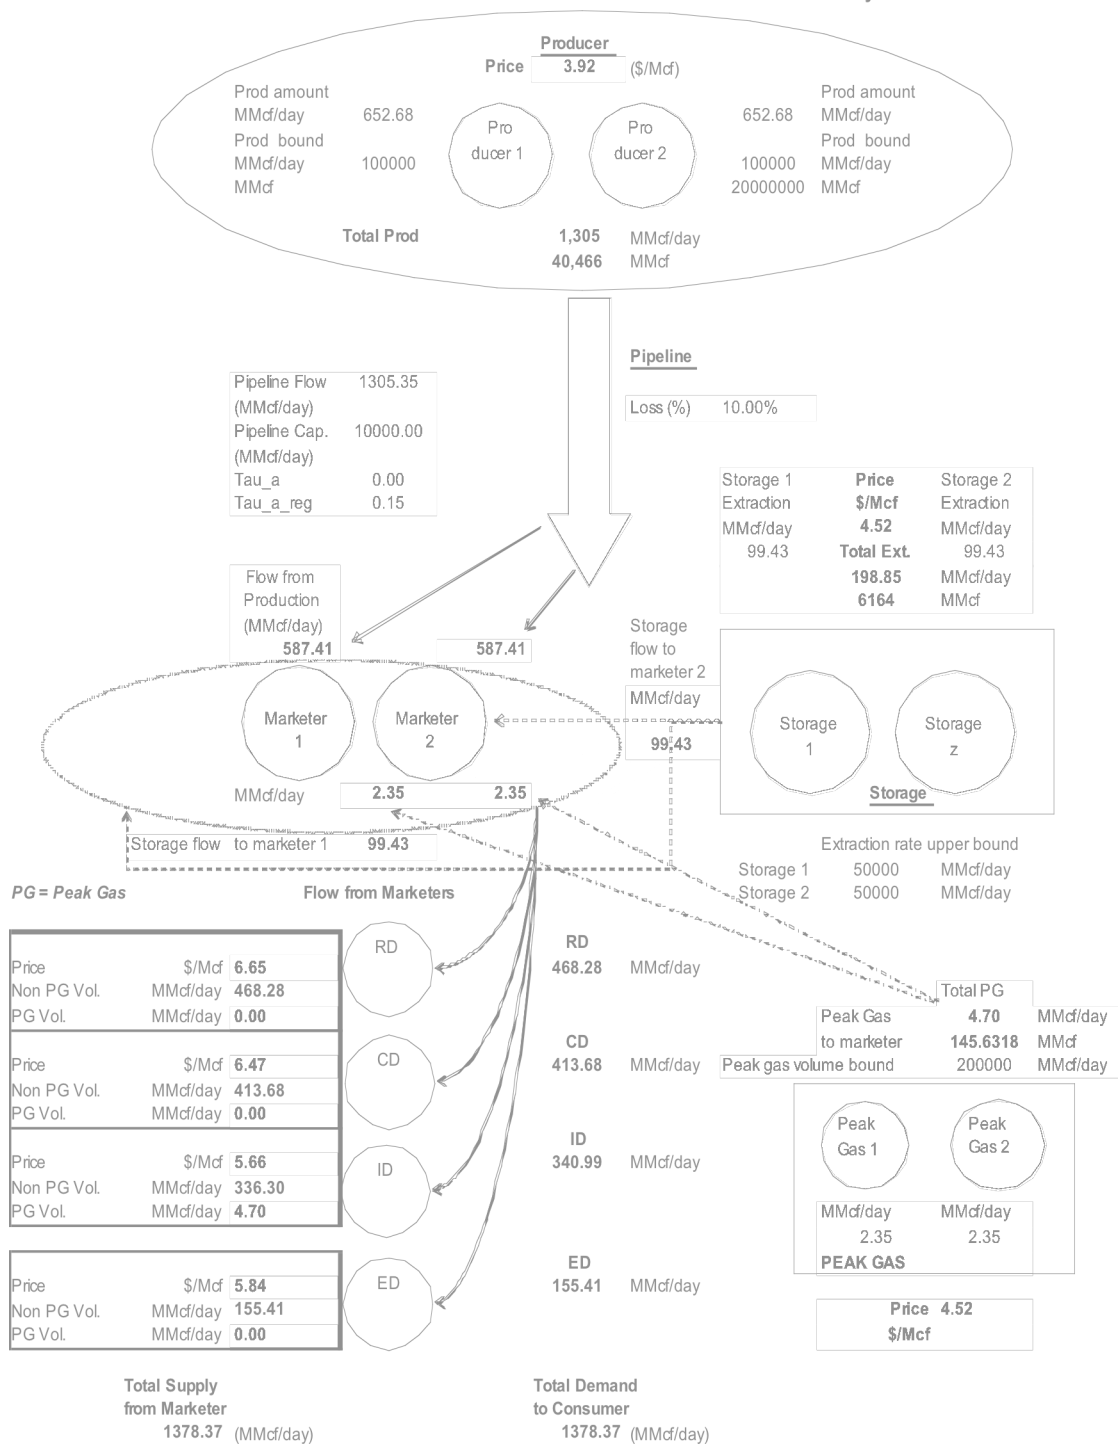

**Figure 3: Base Case Results Season 3.**
